# Supplementary material for: Influences of race and clinical variables on psychiatric genetic research participation: Results from a schizophrenia sample
Source: bioRxiv or medRxiv preprint supplement (doi:10.1101/2022.11.03.22281884), 2022-11-05
Supplement: Supplementary file [file media-1.pdf]

**Supplementary Table 1: N of complete data for relevant variables across time points**

| Variables                    |               | Timepoints |       |      |      |
|------------------------------|---------------|------------|-------|------|------|
|                              |               | Four       | Three | Two  | One  |
| Insight                      |               | 765        | 941   | 1117 | 1328 |
| Illness severity (patient)   |               | 777        | 949   | 1117 | 1335 |
| Illness severity (clinician) |               | 775        | 951   | 1127 | 1335 |
| Depression                   |               | 785        | 952   | 1124 | 1338 |
| PANSS                        |               | 786        | 953   | 1128 | 1339 |
| Neurocognition*              |               | -          | 539   | 824  | 1165 |
| General physical health      |               | 757        | 934   | 1113 | 1325 |
| General mental health        |               | 757        | 934   | 1113 | 1325 |
| Quality of life              |               | 764        | 939   | 1112 | 1324 |
| Competencies*                | Understanding | -          | 628   | 964  | 1253 |
|                              | Appreciation  | -          | 628   | 964  | 1253 |
|                              | Reasoning     | -          | 628   | 964  | 1253 |
|                              | Choice        | -          | 628   | 963  | 1253 |

\*These variables only have 3 timepoints for consistent measurements for most participants.

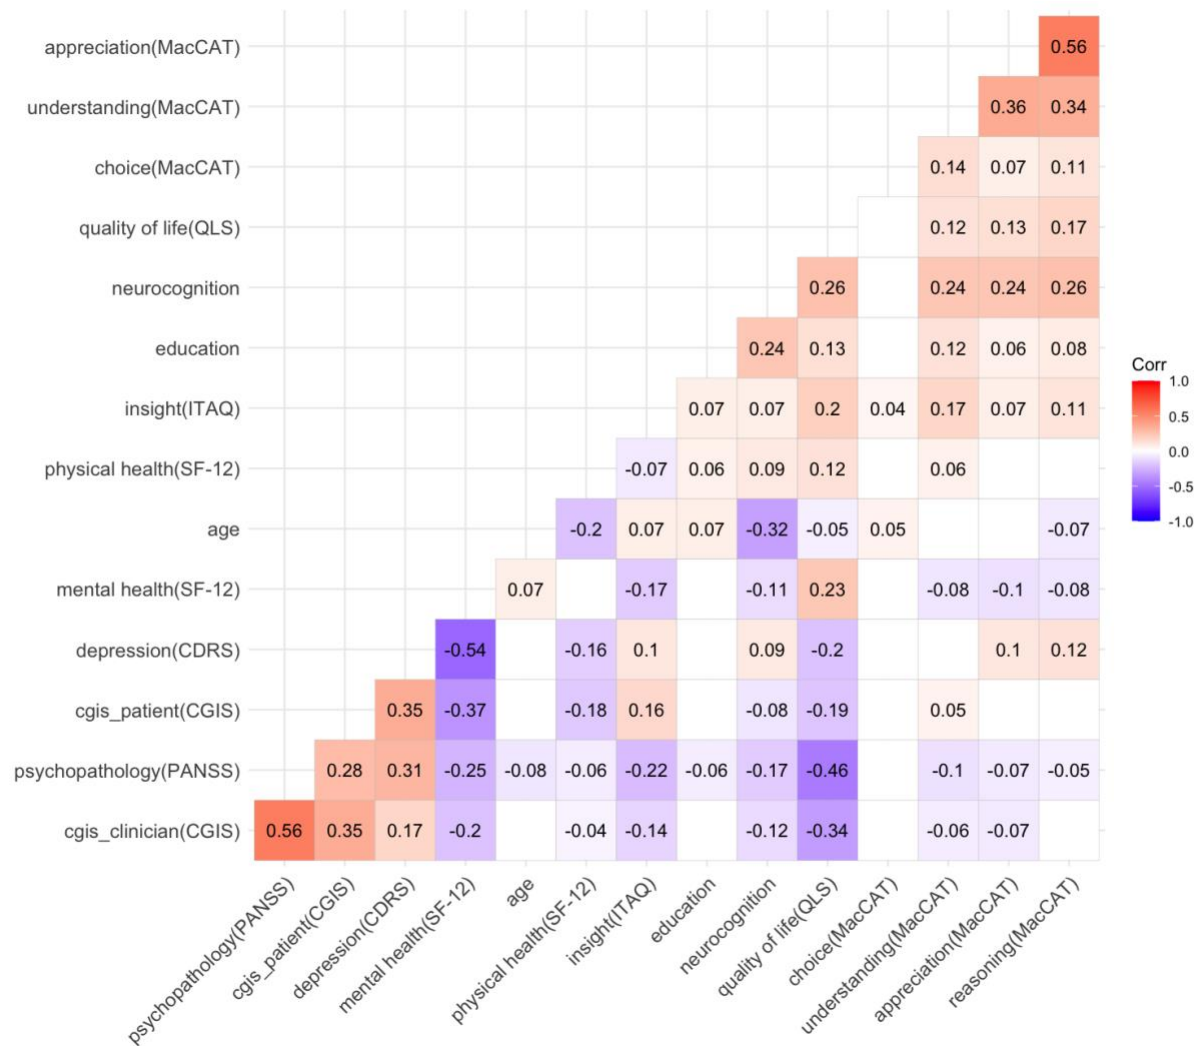

Supplementary Figure 1: Correlogram of relevant variables from baseline. Measures for variables are included in parenthesis. CDRS–Calgary Depression Rating Scale; CGIS–Clinical Global Impression of Symptom Severity; ITAQ–Illness and Treatment Attitude Questionnaire; MacCAT–CR–MacArthur Competence Assessment Tool- Clinical Research; PANSS–Positive and Negative Syndrome Scale; SF-12– 12-item Short Form Survey; QLS–Heinrich-Carpenter Quality of Life Scale.
